# Supplementary material for: Extraction and Identification of Volatile Organic Compounds Emitted by Fragrant Flowers of Three Tillandsia Species by HS-SPME/GC-MS
Source: MDPI journal article supplement (doi:10.3390/metabo11090594), 2021-09-02
Supplement: s1 [file s1]

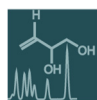

# Supplementary Material

## Extraction and Identification of Volatile Organic Compounds Emitted by Fragrant Flowers of Three *Tillandsia* Species by HS-SPME/GC-MS

Mame-Marietou Lo <sup>1</sup>, Zohra Benfodda <sup>1</sup>, David Bénimélis <sup>1</sup>, Jean-Xavier Fontaine <sup>2</sup>, Roland Molinié <sup>2</sup> and Patrick Meffre <sup>1,\*</sup>

<sup>1</sup> UNIV. NÎMES, UPR CHROME, CEDEX 1, F-30021 Nîmes, France; mame.lo@unimes.fr (M.-M.L.); zohra.benfodda@unimes.fr (Z.B.); david.benimelis@unimes.fr (D.B.)

<sup>2</sup> UMR INRAE 1158 Transfrontalière BioEcoAgro, BIOlogie des Plantes et Innovation (BIOPI), UPJV, UFR de Pharmacie, 80037 Amiens, France; jean-xavier.fontaine@u-picardie.fr (J.-X.F.); roland.molinie@u-picardie.fr (R.M.)

\* Correspondence: patrick.meffre@unimes.fr

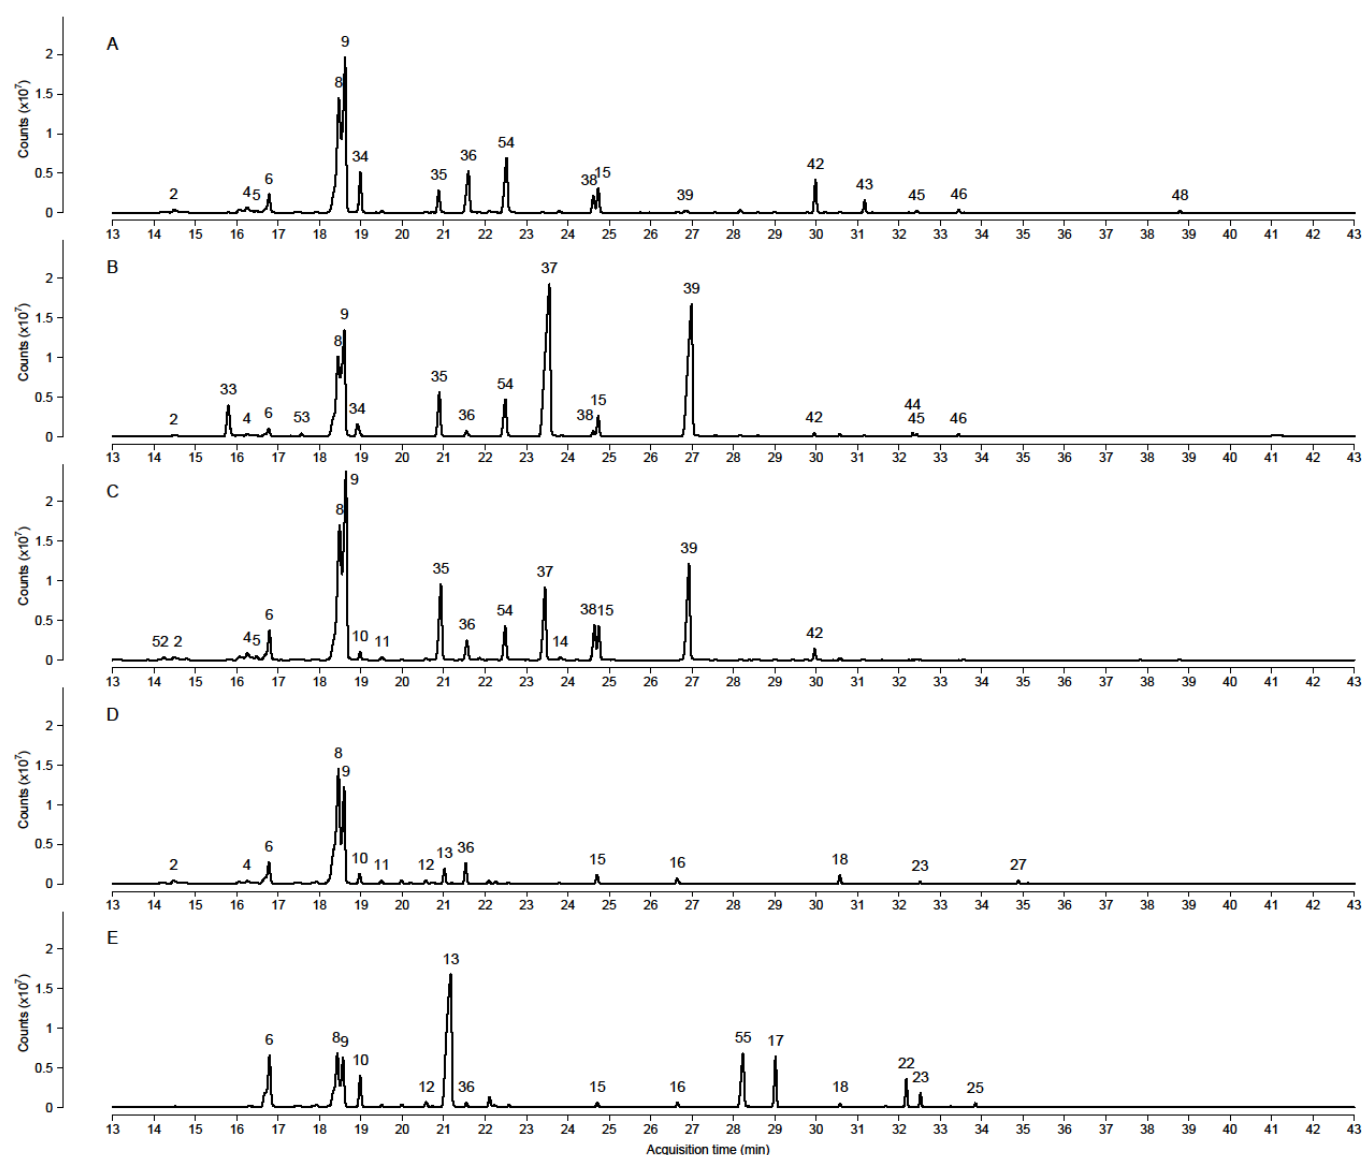

**Figure S1:** Chromatograms obtained using the first extraction method (low values of temperature and extraction time). Chromatographic separation was carried out on a DB-5MS column and the extraction were performed with CAR/PDMS fiber for 20 minutes at an extraction temperature of 30 °C. (A) TIC of orange *crocata*. (B) TIC of yellow *crocata*. (C) TIC of *T. caliginosa*. (D) TIC of LP-xiphi. (E) TIC of HP-xiphi. The identification numbers correspond to those shown in Table 2 and in Table S1.

**Table S1.** Complete table of the identification of volatile compounds from floral emissions of *T. xiphioides*, *T. crocata* and *T. caliginosa*.

| #  | Famil<br>y | Compound                                  | RI   | m/z (min<br>) | Mean $\pm$ SD (x10 <sup>6</sup> ) |                  |                |                   |                  | Odor characteristics <sup>f</sup>                          |
|----|------------|-------------------------------------------|------|---------------|-----------------------------------|------------------|----------------|-------------------|------------------|------------------------------------------------------------|
|    |            |                                           |      |               | YC                                | OC               | Ca             | LP-<br>xiphi      | HP-<br>xiphi     |                                                            |
| 1  | M          | $\alpha$ -thujene <sup>b,d</sup>          | 919  | 136 14.15     | nd                                | 1.8 $\pm$ 0.4    | nd             | 3.2 $\pm$ 1.8     | nd               | wood, green, herb                                          |
| 2  | M          | $\alpha$ -pinene <sup>c,d</sup>           | 927  | 136 14.46     | 2.5 $\pm$ 0.6                     | 2.9 $\pm$ 0.4    | 2.4 $\pm$ 1    | 4.5 $\pm$ 1.2     | nd               | pine, turpentine                                           |
| 3  | M          | Sabinene <sup>c,d</sup>                   | 969  | 136 16.05     | 2.1 $\pm$ 0.4                     | 3 $\pm$ 0.3      | 2.7 $\pm$ 0.9  | 3 $\pm$ 1.5       | nd               | pepper, turpentine, wood                                   |
| 4  | M          | $\beta$ -<br>phellandrene <sup>b,d</sup>  | 973  | 136 16.23     | 2.5 $\pm$ 0.4                     | 5 $\pm$ 0.5      | 4.2 $\pm$ 2.1  | 4.6 $\pm$ 1.1     | nd               | mint, turpentine                                           |
| 5  | M          | $\beta$ -pinene <sup>c,d</sup>            | 979  | 136 16.46     | nd                                | 2 $\pm$ 0.5      | 2.8 $\pm$ 0.8  | 2.9 $\pm$ 1.6     | nd               | pine, resin, turpentine                                    |
| 6  | M          | $\beta$ -myrcene <sup>c,d</sup>           | 988  | 136 16.78     | 4.6 $\pm$ 0.9                     | 11.4 $\pm$ 1.8   | 12.2 $\pm$ 3.9 | 45.9 $\pm$ 19.2   | 40.1 $\pm$ 12.6  | balsamic, must, spice                                      |
| 7  | M          | $\alpha$ -<br>phellandrene <sup>b,d</sup> | 1007 | 136 17.51     | nd                                | nd               | nd             | 6.5 $\pm$ 5.2     | nd               | citrus, herbal, woody, peppery                             |
| 8  | M          | Limonene <sup>c,d</sup>                   | 1033 | 136 18.52     | 58.6 $\pm$ 8.5                    | 107.5 $\pm$ 12.4 | 81.1 $\pm$ 24  | 99 $\pm$ 44.8     | 69.7 $\pm$ 71.5  | lemon, orange                                              |
| 9  | M          | Eucalyptol <sup>c,d</sup>                 | 1036 | 154 18.66     | 74.4 $\pm$ 11.5                   | 107.8 $\pm$ 15   | 90.2 $\pm$ 27  | 69.9 $\pm$ 30.5   | 47.7 $\pm$ 40.3  | mint, sweet                                                |
| 10 | M          | $\beta$ -ocimene <sup>c,d</sup>           | 1045 | 136 18.98     | nd                                | nd               | 3 $\pm$ 1.2    | 183.8 $\pm$ 212.7 | 56.3 $\pm$ 104.8 | sweet, herb                                                |
| 11 | M          | $\gamma$ -terpinene <sup>c,d</sup>        | 1058 | 136 19.5      | nd                                | nd               | 1.6 $\pm$ 0.5  | 2.9 $\pm$ 1.6     | nd               | gasoline, turpentine, lemon                                |
| 12 | M          | Terpinolene <sup>b,d</sup>                | 1086 | 136 20.57     | nd                                | nd               | nd             | 3.3 $\pm$ 1.7     | nd               | sweet, fresh, pine, citrus,<br>woody, lemon peel           |
| 13 | M          | $\beta$ -linalool <sup>c,d</sup>          | 1097 | 154 21.02     | nd                                | nd               | nd             | 15.8 $\pm$ 10.9   | 97.3 $\pm$ 38.7  | citrus, orange, floral, terpy, rose                        |
| 14 | M          | $\beta$ -fenchol <sup>c,d</sup>           | 1171 | 154 23.8      | nd                                | nd               | 2.3 $\pm$ 0.5  | nd                | nd               | pine, woody, dry, sweet, lemon                             |
| 15 | M          | $\alpha$ -terpineol <sup>c,d</sup>        | 1196 | 154 24.71     | 10.7 $\pm$ 2.1                    | 18.3 $\pm$ 6     | 15.9 $\pm$ 2.8 | 8 $\pm$ 6.2       | 5.5 $\pm$ 6.3    | oil, anise, mint                                           |
| 16 | M          | Geraniol <sup>c,d</sup>                   | 1249 | 154 26.64     | nd                                | 2.9 $\pm$ 0.6    | nd             | 11.5 $\pm$ 9.7    | 6.7 $\pm$ 2.8    | rose, geranium                                             |
| 17 | M          | Methyl<br>geranate <sup>b,e</sup>         | 1320 | 182 29.02     | nd                                | nd               | nd             | nd                | 11.4 $\pm$ 7.5   | waxy, green, fruity                                        |
| 18 | M          | Geranyl<br>acetate <sup>c,e</sup>         | 1378 | 196 30.59     | 3 $\pm$ 1.3                       | 2.5 $\pm$ 0.3    | 1.5 $\pm$ 0.4  | 191.3 $\pm$ 103.6 | 56.5 $\pm$ 40.1  | floral, rose, lavender, green,<br>waxy                     |
| 19 | M          | Geranyl<br>butyrate <sup>b,e</sup>        | 1556 | 224 34.75     | nd                                | nd               | nd             | 14.7 $\pm$ 10.5   | 7.7 $\pm$ 7.4    | fruity-floral, rose, apple-like                            |
| 20 | M          | Geranyl<br>tiglate <sup>b,e</sup>         | 1695 | 236 37.39     | nd                                | nd               | nd             | nd                | 8.2 $\pm$ 9.8    | sweet-herbaceous, geranium-like,<br>light fruity undertone |
| 21 | M          | Geranyl<br>hexanoate <sup>b,e</sup>       | 1748 | 252 38.27     | nd                                | nd               | nd             | 9.3 $\pm$ 6.7     | 7.4 $\pm$ 7.4    | rose, geranium, fruity, waxy                               |
| 22 | S          | $\alpha$ -<br>bergamotene <sup>b,e</sup>  | 1439 | 204 32.16     | 1.8 $\pm$ 0.5                     | nd               | nd             | 5.3 $\pm$ 3.2     | 5.1 $\pm$ 4.6    | wood, warm, tea                                            |

|    |   |                                        |      |     |       |                |               |               |                |           |                                                             |
|----|---|----------------------------------------|------|-----|-------|----------------|---------------|---------------|----------------|-----------|-------------------------------------------------------------|
| 23 | S | $\beta$ -farnesene <sup>b,e</sup>      | 1454 | 204 | 32.55 | 50.9<br>±22.3  | 11 ±1.7       | 7.2 ±3.8      | 32.1 ±13       | 20.9 ±8   | wood, citrus, sweet                                         |
| 24 | S | $\alpha$ -farnesene <sup>b,e</sup>     | 1503 | 204 | 33.69 | 10.8<br>±4.7   | 4.1 ±0.9      | 2.6 ±1.2      | 11.8 ±6.2      | 7 ±4.3    | wood, sweet                                                 |
| 25 | S | $\beta$ -bisabolene <sup>b,e</sup>     | 1512 | 204 | 33.86 | 3 ±0.9         | 1.9 ±0.3      | nd            | 8 ±2.8         | 10.1 ±4.6 | balsamic, woody                                             |
| 26 | S | $\alpha$ -bisabolene <sup>b,e</sup>    | 1544 | 204 | 34.52 | nd             | nd            | nd            | 5.2 ±2.4       | 5.6 ±7.5  | balsamic, spicy, floral                                     |
| 27 | S | Nerolidol <sup>c,e</sup>               | 1567 | 222 | 34.98 | 2.5 ±0.8       | 4.2 ±4.6      | nd            | 182.4<br>±87.9 | 88 ±67.3  | floral, green, waxy, citrus, woody                          |
| 28 | S | Denderalasin <sup>b,e</sup>            | 1577 | 218 | 35.17 | nd             | nd            | nd            | 45.7 ±31       | 30.3 ±25  | -                                                           |
| 29 | S | $\alpha$ -patchoulene <sup>b,e</sup>   | 1595 | 204 | 35.55 | 3.5 ±1.4       | nd            | nd            | 6.5 ±3.3       | 5 ±4.1    | wood, spicy                                                 |
| 30 | S | Farnesol <sup>c,e</sup>                | 1720 | 222 | 37.81 | 85.1<br>±27.2  | 40.1<br>±6.6  | 13.7<br>±6.7  | nd             | nd        | fresh, green, muguet note                                   |
| 31 | S | Farnesal <sup>b,e</sup>                | 1740 | 220 | 38.16 | 5.3 ±1.9       | 2.4 ±0.2      | nd            | nd             | nd        | floral, minty                                               |
| 32 | S | Farnesyl<br>acetate <sup>b,e</sup>     | 1832 | 264 | 39.67 | 41.2<br>±18.7  | 4.9 ±1.5      | 9.9 ±8        | nd             | nd        | green, floral, rose                                         |
| 33 | P | Benzaldehyde <sup>c,d</sup>            | 962  | 106 | 15.8  | 4.6 ±3.2       | 2.2 ±0.1      | 1.6 ±0.2      | nd             | nd        | fruity, powerful, cherry, bitter<br>almond                  |
| 34 | P | Phenylacetalde-<br>hyde <sup>c,d</sup> | 1043 | 120 | 18.92 | 21<br>±49.3    | 2.4 ±0.5      | nd            | nd             | nd        | green floral, strongly hyacinth<br>note                     |
| 35 | P | Methyl<br>benzoate <sup>c,d</sup>      | 1094 | 136 | 20.89 | 7.5 ±3.2       | 2.9 ±0.5      | 16.4<br>±8.7  | nd             | nd        | aromatic, sweet, floral, a fruity<br>undertone              |
| 36 | P | Benzene<br>ethanol <sup>b,d</sup>      | 1112 | 122 | 21.57 | 7.8 ±2.4       | 12.5<br>±7.7  | 11.2<br>±4.8  | nd             | nd        | sweet, fresh, aromatic                                      |
| 37 | P | Benzylacetate <sup>c,d</sup>           | 1161 | 150 | 23.43 | 50.2<br>±23.3  | nd            | 9.6 ±6.3      | nd             | nd        | floral, fruity, jasmine, fresh                              |
| 38 | P | Methyl<br>salicylate <sup>c,d</sup>    | 1193 | 152 | 24.63 | 5.2 ±2.5       | 10.4<br>±2.9  | 17.7<br>±7.3  | nd             | nd        | minty, spicy, sweet                                         |
| 39 | P | Phenylethyl<br>acetate <sup>c,d</sup>  | 1255 | 164 | 26.87 | 130.4<br>±52.3 | nd            | 19<br>±20.6   | nd             | nd        | floral, rose, sweet, honey, fruity,<br>tropical             |
| 40 | P | Cinnamaldehyd<br>e <sup>b,e</sup>      | 1273 | 132 | 27.5  | 4.5 ±5         | 5.7 ±1.7      | 3.8 ±1.4      | nd             | nd        | very strong, sweet, balsamic,<br>typically cinnamon         |
| 41 | P | Alcool<br>cinnamique <sup>c,e</sup>    | 1305 | 134 | 28.61 | 10.9<br>±16.7  | 10.8<br>±2.9  | 6.3 ±3.6      | nd             | nd        | warm-balsamic, floral-hyacinth,<br>rose                     |
| 42 | P | Eugenol <sup>c,e</sup>                 | 1353 | 164 | 29.96 | 8.2 ±7         | 136<br>±49.4  | 91.8<br>±20.7 | nd             | nd        | sweet, spicy-clove, woody                                   |
| 43 | P | Methyl<br>eugenol <sup>c,e</sup>       | 1396 | 178 | 31.18 | 3.3 ±1.9       | 9.7<br>±15.7  | nd            | nd             | nd        | spicy, cinnamon, clove, musty,<br>vegetative, waxy, peppery |
| 44 | P | Cinnamyl<br>acetate <sup>b,e</sup>     | 1446 | 176 | 32.37 | nd             | 6.3 ±1.5      | nd            | nd             | nd        | sweet, floral, spicy, balsam,<br>cinnamon                   |
| 45 | P | Isoeugenol <sup>c,e</sup>              | 1451 | 164 | 32.45 | 46.4<br>±12.5  | 6.1 ±0.8      | 6.8 ±1.9      | nd             | nd        | sweet, spicy, clove, woody                                  |
| 46 | P | Methyl<br>isoeugenol <sup>b,e</sup>    | 1494 | 178 | 33.49 | 26<br>±23.8    | 8 ±13.1       | nd            | nd             | nd        | mildly spicy, like clove blossom<br>oil                     |
| 47 | P | Zingerone <sup>b,e</sup>               | 1646 | 194 | 36.5  | nd             | 4.6 ±1.9      | 20.1<br>±9.3  | nd             | nd        | sweet, spicy, phenolic, ginger,<br>vanilla, woody           |
| 48 | P | Benzyl<br>benzoate <sup>c,e</sup>      | 1781 | 212 | 38.83 | 41.2<br>±23.4  | 83.5<br>±28.2 | 13.5<br>±9.2  | nd             | nd        | sweet, balsamic, floral, fruity<br>nuances                  |
| 49 | P | Phenethyl<br>benzoate <sup>b,e</sup>   | 1868 | 226 | 40.24 | 2 ±0.4         | 47.9<br>±17.8 | 10.7<br>±6.3  | nd             | nd        | sweet, fruity, rose                                         |

|    |   |                                       |      |     |       |             |            |            |    |           |                                            |
|----|---|---------------------------------------|------|-----|-------|-------------|------------|------------|----|-----------|--------------------------------------------|
| 50 | P | Benzyl salicylate <sup>b,e</sup>      | 1885 | 228 | 40.51 | 15.5 ±9.9   | 47.9 ±23.6 | nd         | nd | nd        | sweet, balsamic, slightly curative         |
| 51 | P | Phenethyl salicylate <sup>a,e</sup>   | -    | 242 | 42.09 | nd          | 2.1 ±0.3   | nd         | nd | nd        | balsamic, floral, rose, hyacinth carnation |
| 52 | O | Methyl hexanoate <sup>b,d</sup>       | 920  | 136 | 14.24 | nd          | nd         | 1.9 ±0.8   | nd | nd        | etheral, fruity, pineapple                 |
| 53 | O | Hexyl acetate <sup>c,d</sup>          | 1009 | 144 | 17.58 | nd          | nd         | 1.4 ±0.6   | nd | nd        | green, fruity, sweet, fatty, fresh, apple  |
| 54 | O | Methyl nicotinate <sup>c,d</sup>      | 1139 | 137 | 22.59 | 121.9 ±24.4 | 143 ±28.9  | 80.9 ±11.8 | nd | nd        | warm, herbal, tobacco                      |
| 55 | O | Indole <sup>b,e</sup>                 | 1296 | 117 | 28.22 | 10.6 ±6.6   | 5.6 ±3.1   | nd         | nd | 6.6 ±6.7  | mothball, burnt, animal, fecal             |
| 56 | O | Methyl tetradecanoate <sup>b,e</sup>  | 1722 | 242 | 37.85 | nd          | nd         | 12.7 ±10.2 | nd | nd        | fatty, waxy, petal                         |
| 57 | O | p-tolyl octanoate <sup>b,e</sup>      | 1753 | 234 | 38.36 | 10.2 ±8.2   | 2.3 ±0.4   | nd         | nd | nd        | animal, fecal, indole, green               |
| 58 | O | 11-hexadecenal <sup>b,e</sup>         | 1806 | 238 | 39.24 | nd          | nd         | 4 ±1.3     | nd | nd        | waxy                                       |
| 59 | O | Hexadecanal <sup>b,e</sup>            | 1818 | 240 | 39.43 | nd          | nd         | 9.4 ±3.2   | nd | nd        | cardboard                                  |
| 60 | O | Phenethyl octanoate <sup>b,e</sup>    | 1851 | 248 | 39.97 | 2.4 ±1      | 4.1 ±1.9   | nd         | nd | nd        | sweet, waxy, green, cocoa, fruity          |
| 61 | O | 1-hexadecanol <sup>b,e</sup>          | 1879 | 242 | 40.42 | 18.1 ±8.6   | 9.5 ±4.7   | 76.3 ±9.2  | nd | nd        | waxy, greasy, floral oily                  |
| 62 | O | Methyl palmitoleate <sup>a,e</sup>    | -    | 268 | 40.96 | nd          | nd         | 8.9 ±5.2   | nd | nd        | -                                          |
| 63 | O | Methyl palmitate <sup>a,e</sup>       | -    | 270 | 41.14 | nd          | 40.6 ±20.2 | 12.8 ±10.7 | nd | 10.5 ±5.8 | oily, waxy, fatty                          |
| 64 | O | Benzyl decanoate <sup>a,e</sup>       | -    | 262 | 41.76 | 2.7 ±1.9    | 2 ±0.3     | nd         | nd | nd        | -                                          |
| 65 | O | 11-hexadecenyl acetate <sup>a,e</sup> | -    | 282 | 42.43 | nd          | nd         | 5.4 ±1.3   | nd | nd        | -                                          |
| 66 | O | Hexadecyl ethanoate <sup>a,e</sup>    | -    | 284 | 42.66 | 4.9 ±2.8    | nd         | 51.6 ±11.1 | nd | nd        | -                                          |

YC = Yellow *crocata*, OC = Orange *crocata*, Ca = *T. caliginosa*, nd = not detected., M = Monoterpene, S = Sesquiterpene, P = Phenylpropanoid, O = Other, a = identification performed by comparing the mass spectrum with that of the NIST library., b = identification performed by comparing the mass spectrum with that of the NIST library and by comparison of RI (retention index) with RI of published literatures and online library (<https://webbook.nist.gov/chemistry/cas-ser.html>), c = identification performed by comparing the mass spectrum with that of the NIST library, by comparison of RI (retention index) with RI of published literatures and online library and by comparison of retention time and mass spectrum of the authentic standard, d = efficient extraction with the first method, low values of temperature and extraction time (30 °C and 20 min), e = efficient extraction with the second method, high values of temperature and extraction time (75 °C and 65 min), f = odor characteristics were obtained from the “The Good Scents” company network database ([www.thegoodscentscompany.com](http://www.thegoodscentscompany.com)).
